# Supplementary material
Source: PubMed Central journal article supplement (PMC8355212)

# Sup. Figure 1

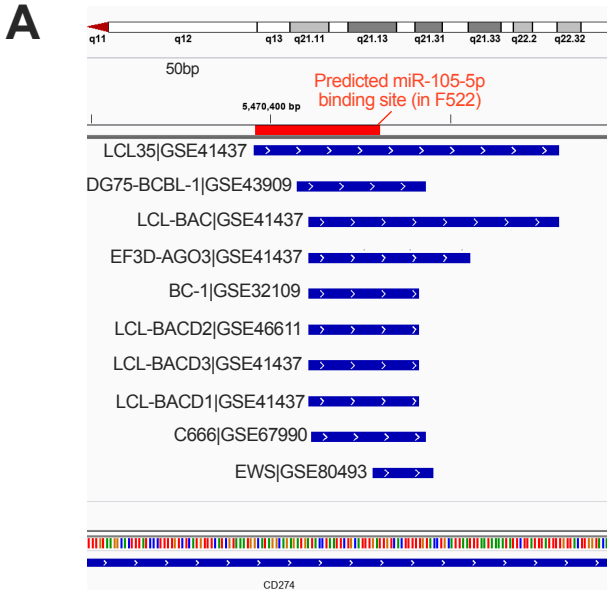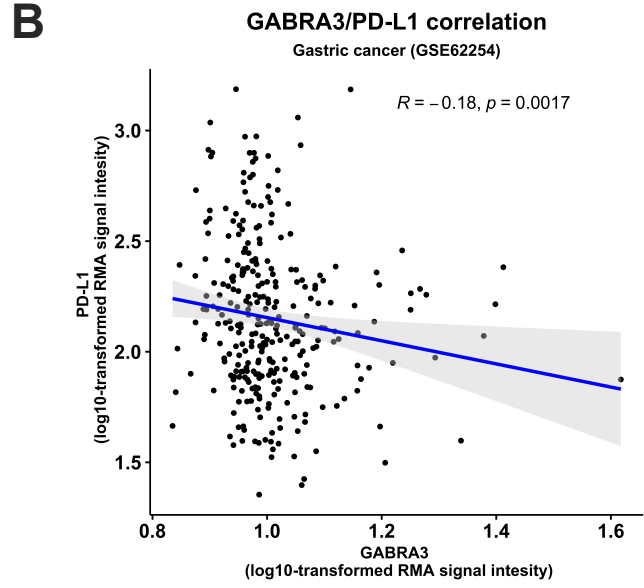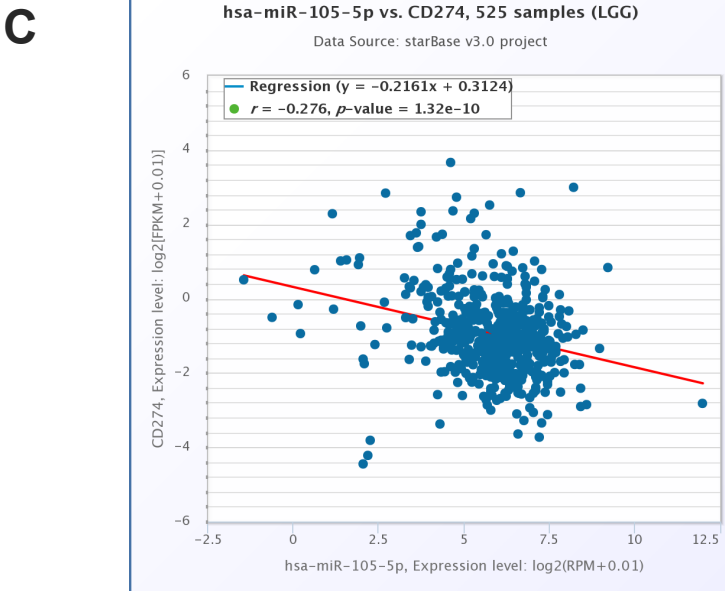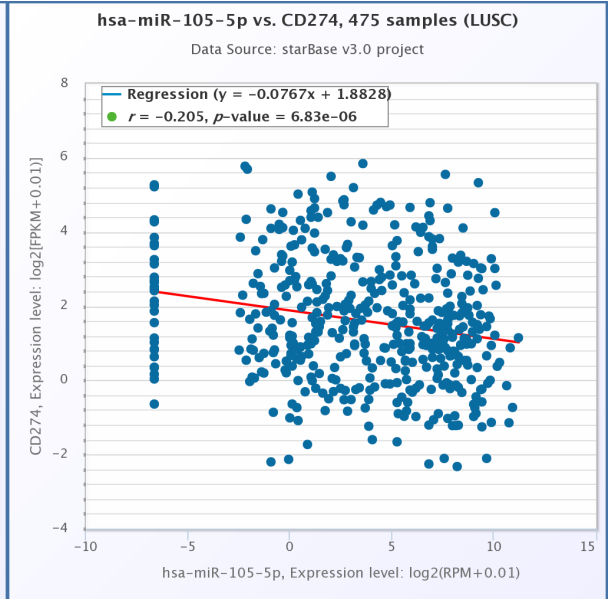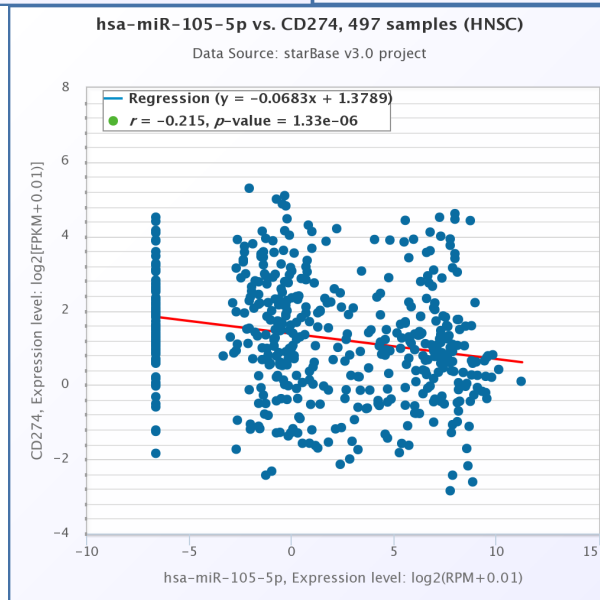

Supplement: NIHMS1718410-supplement-2.pdf [file NIHMS1718410-supplement-2.pdf]

# Sup. Figure 2

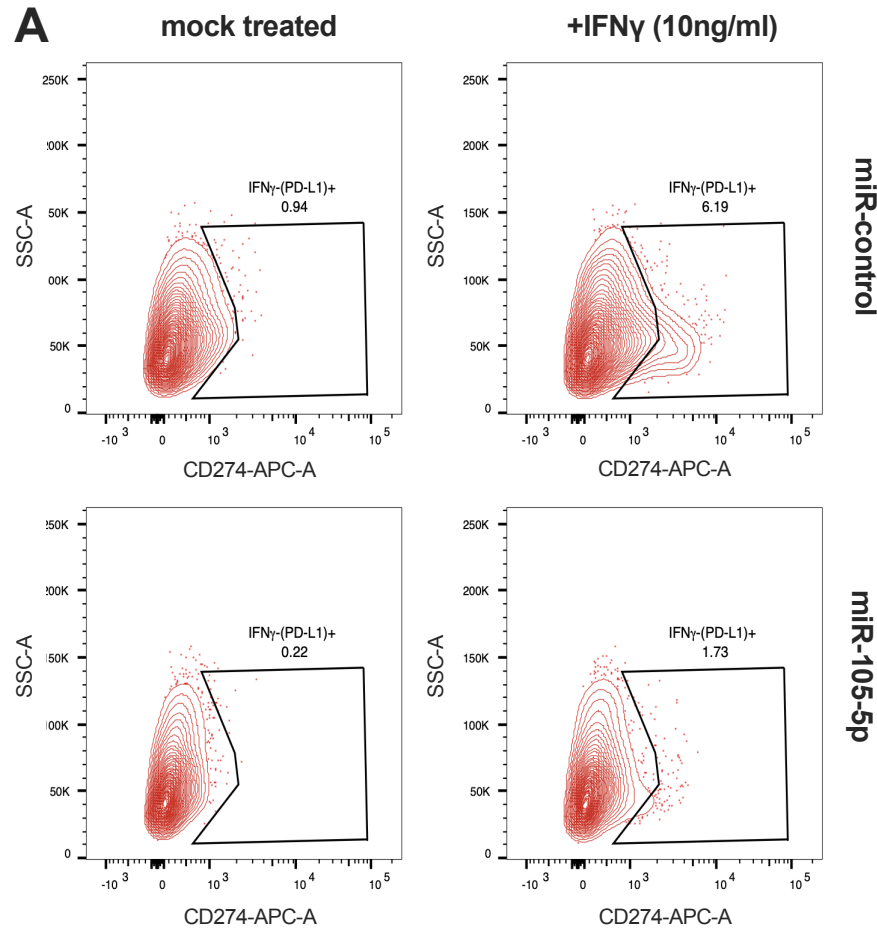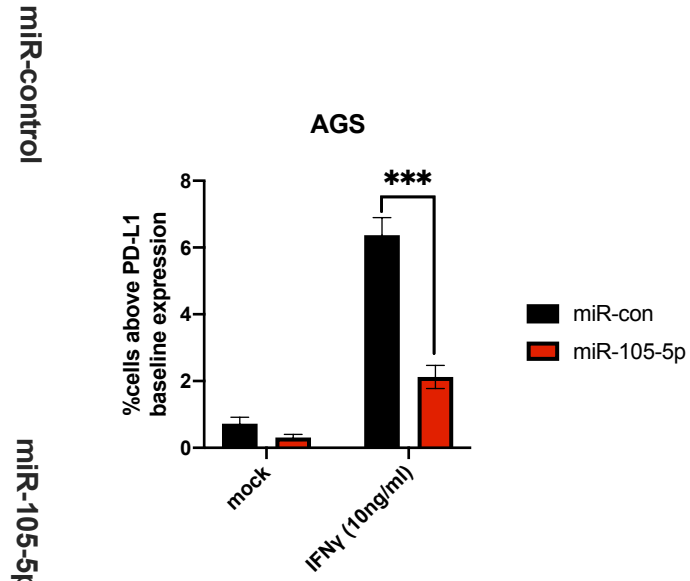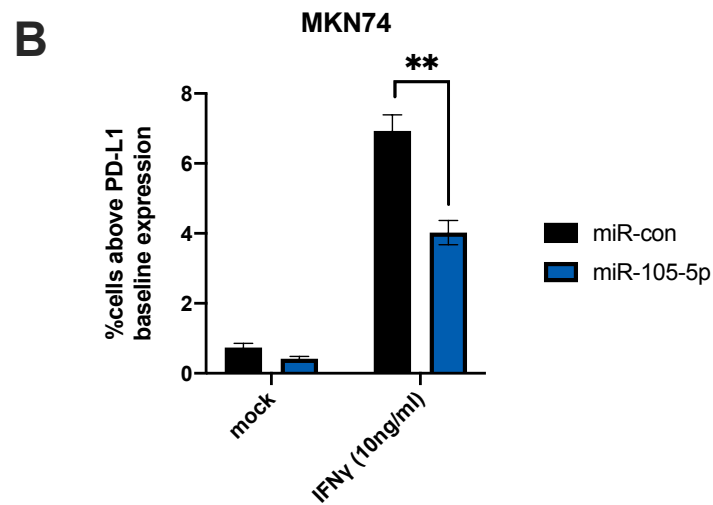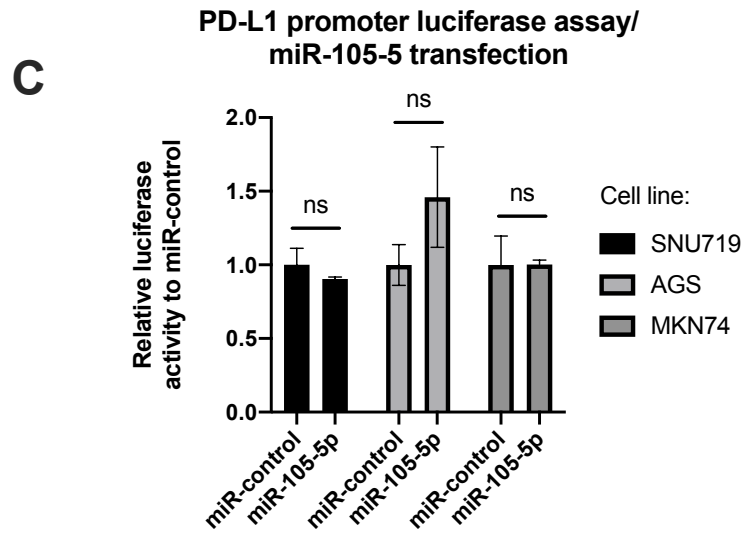

Supplement: NIHMS1718410-supplement-3.pdf [file NIHMS1718410-supplement-3.pdf]

# Sup. Figure 3

***PD-L1* expression in stable AGS cells following miR mimic transfection**

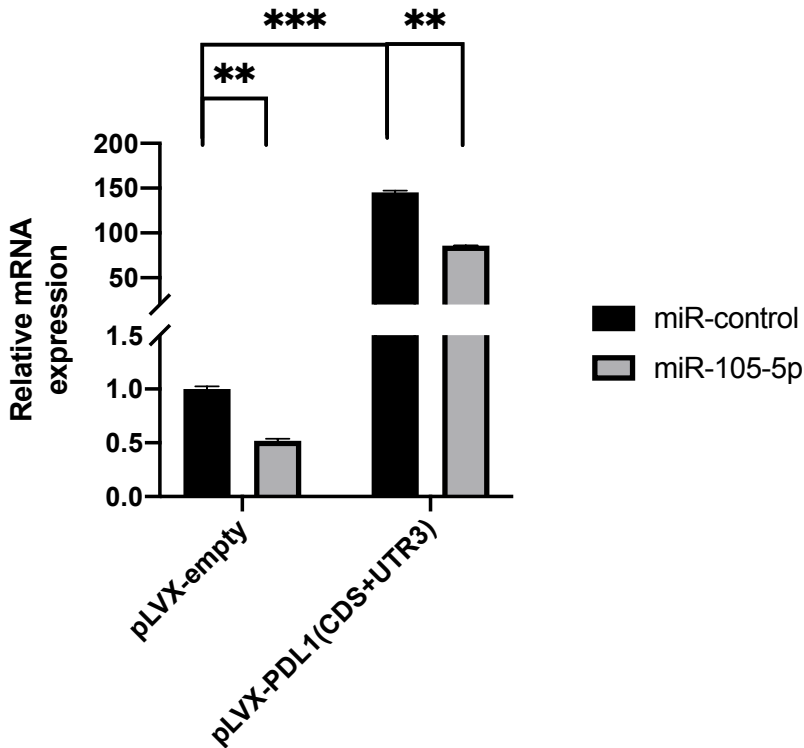

Supplement: NIHMS1718410-supplement-4.pdf [file NIHMS1718410-supplement-4.pdf]

# Sup. Figure 4

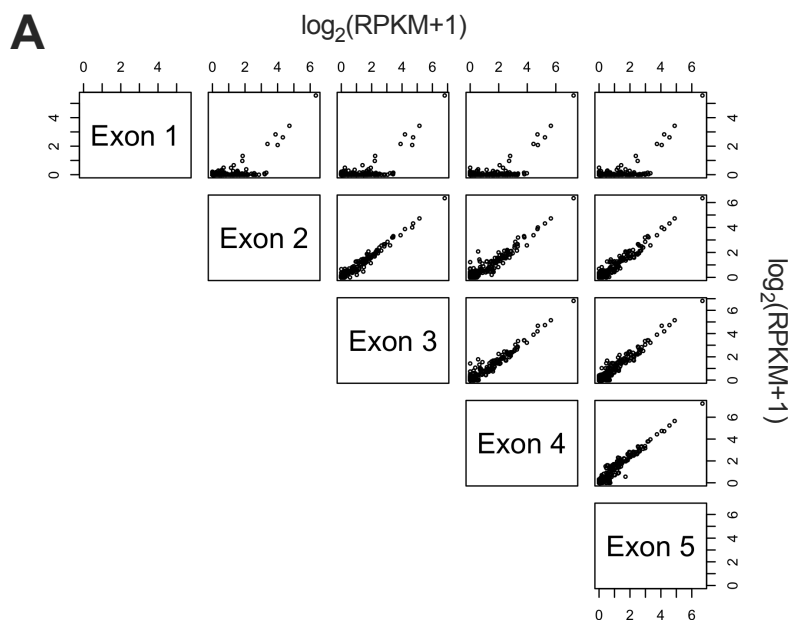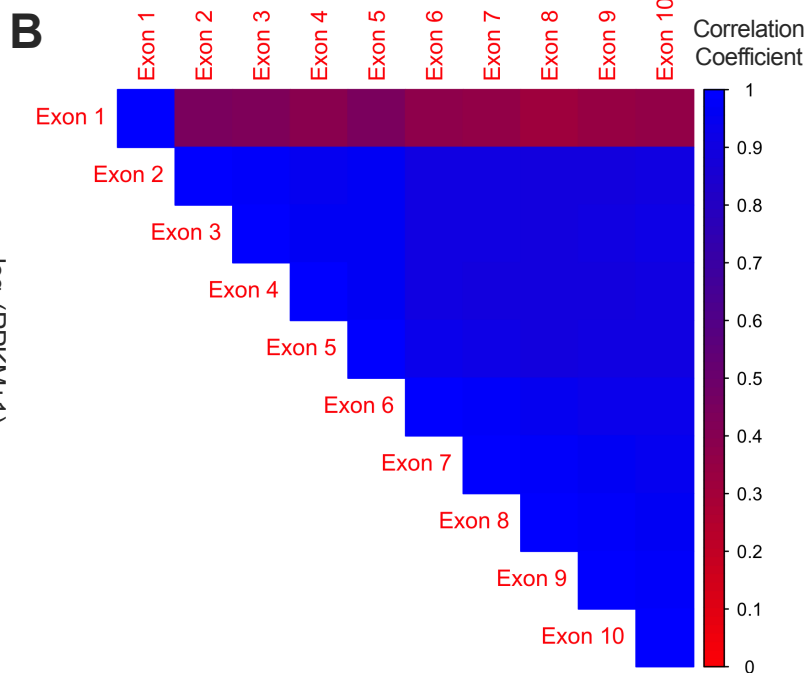

**C**

| Exon #  | Number of samples with RPKM > 0.5 |
|---------|-----------------------------------|
| Exon 1  | 9                                 |
| Exon 2  | 90                                |
| Exon 3  | 101                               |
| Exon 4  | 101                               |
| Exon 5  | 98                                |
| Exon 6  | 112                               |
| Exon 7  | 111                               |
| Exon 8  | 121                               |
| Exon 9  | 118                               |
| Exon 10 | 115                               |

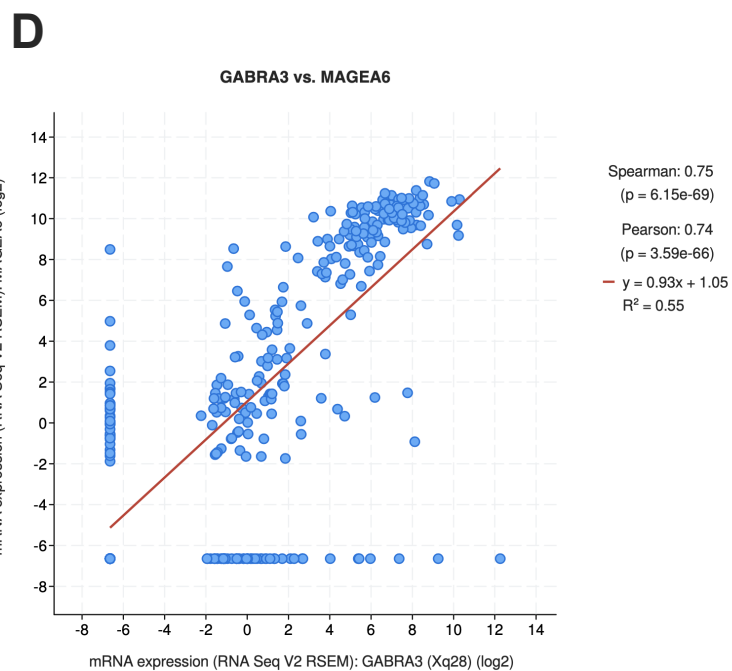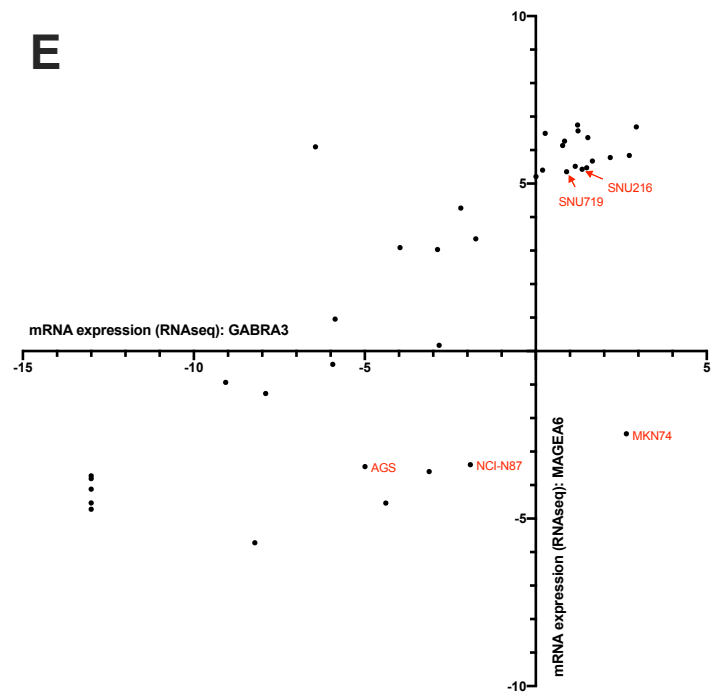

Supplement: NIHMS1718410-supplement-5.pdf [file NIHMS1718410-supplement-5.pdf]
